# Supplementary material for: Analysis of dual solution for MHD flow of Williamson fluid with slippage
Source: PubMed Central journal article supplement — Heliyon. 2019 Mar 18;5(3):e01345. doi: 10.1016/j.heliyon.2019.e01345 (PMC6429819; doi:10.1016/j.heliyon.2019.e01345), 2019-03-18

## Appendix A. Program for graph no: 5

*with( Shoot );*

> *with( plots ) :*

>  $\sigma := -0.25; \lambda := 0.1; M := 1; \xi := -1; S$   
 $:= 2;$

>  $Pr := 2; \delta := 0.1; \beta := 0.1;$

>  $blt1 := 6; blt2 := 6;$

>  $FNS := \{F(\eta), Fp(\eta), Fpp(\eta), \theta(\eta), \theta p(\eta)\};$

>  $ODE := \left\{ \begin{aligned} &diff(F(\eta), \eta) = Fp(\eta), diff(Fp(\eta), \eta) = Fpp(\eta), \\ &diff(Fpp(\eta), \eta) = \frac{1}{(1 - \lambda \cdot Fpp(\eta))} \cdot (2 \cdot Fp(\eta)^2 - F(\eta) \\ &\cdot Fpp(\eta) + M \cdot Fp(\eta) - 2 \cdot \sigma \cdot \theta(\eta)), diff(\theta(\eta), \eta) = \theta p(\eta), \\ &diff(\theta p(\eta), \eta) = Pr \cdot (4 \cdot Fp(\eta) \cdot \theta(\eta) - F(\eta) \cdot \theta p(\eta)) \end{aligned} \right\};$

>  $IC1 := \{F(0) = S, Fpp(0) = \alpha, Fp(0) = \xi + \delta \cdot \alpha, \theta p(0) = \psi, \theta(0)$   
 $= 1 + \beta \cdot \psi, \};$

>  $BC1 := \{Fp(blt1) = 0, \theta(blt1) = 0\}; BC2 := \{Fp(blt2) = 0, \theta(blt2)$   
 $= 0\};$

>  $infolevel[shoot] := 1 :$

>  $S1 := shoot(ODE, IC1, BC1, FNS, [\alpha$   
 $= 1.5105195266, \psi = -1.655971477, ])$  :

`"shoot: Step # 1`

`shoot: Parameter values : alpha = 1.5105195266 psi = -`  
`1.655971477`

`shoot: Step # 2`

`shoot: Parameter values : alpha = HFloat(1.510521218439437) psi`  
`= HFloat(-1.6559738241753188)"`

>  $W1 := shoot(ODE, IC1, BC2, FNS, [\alpha$   
 $= 0.688307076, \psi = 2.933294862, ])$  :

`"shoot: Step # 1`

`shoot: Parameter values : alpha = .688307076 psi = 2.933294862`  
`shoot: Step # 2`

`shoot: Parameter values : alpha = HFloat(0.6882626381903993)`  
`psi = HFloat(2.9337283407793278)"`

- >  $p1 := \text{odeplot}(S1, [\eta, Fp(\eta)], 0 ..blt1,$   
 $\text{numpoints} = 500, \text{color} = \text{blue}) :$
- >  $p2 := \text{odeplot}(S1, [\eta, \theta(\eta)], 0 ..blt1,$   
 $\text{numpoints} = 500, \text{color} = \text{blue}) :$
- >  $\text{display}(p1, p2)$

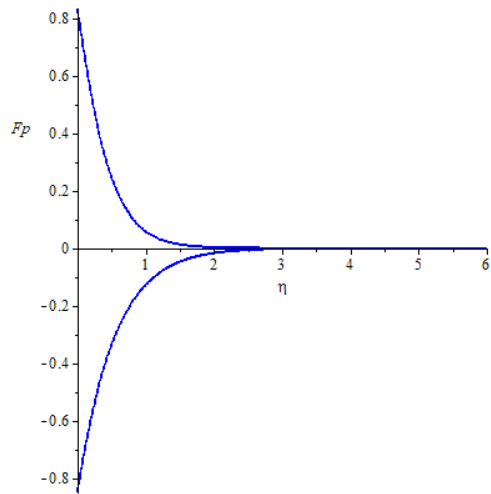

- >  $w1 := \text{odeplot}(W1, [\eta, Fp(\eta)], 0 ..blt2,$   
 $\text{numpoints} = 500, \text{color} = \text{red}) :$
- >  $w2 := \text{odeplot}(W1, [\eta, \theta(\eta)], 0 ..blt2,$   
 $\text{numpoints} = 500, \text{color} = \text{red}) :$
- >  $\text{display}(w1, w2)$

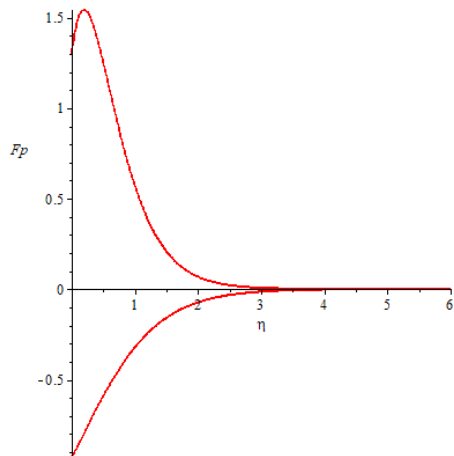

Supplement: mmc1.pdf [file mmc1.pdf]
